# Supplementary material
Source: MDPI journal article supplement (https://www.mdpi.com/2071-1050/15/16/12123)
Supplement: s1 [file s1]

# Enrichment of Anammox Bacteria Using Anammox Sludge as a Primer Combined with Ordinary Activated Sludge

Lifang Liu <sup>1,2</sup>, Meiling Hu <sup>3</sup>, Cong Wang <sup>1,2,\*</sup>, Weikang Qi <sup>1</sup> and Yongzhen Peng <sup>1</sup>

<sup>1</sup> National Engineering Laboratory for Advanced Municipal Wastewater Treatment and Reuse Technology, Key Laboratory of Beijing for Water Quality Science and Water Environment Recovery Engineering, Beijing University of Technology, Beijing 100124, China; l1978659045@163.com (L.L.); qiweikang10@163.com (W.Q.); pyz@bjut.edu.cn (Y.P.)

<sup>2</sup> Beijing Drainage Group Co., Ltd., Beijing 100044, China

<sup>3</sup> D.smart Environmental Technology Co., Limited, Beijing 100102, China; hook361@163.com

\* Correspondence: 18001093291@163.com; Tel.: +86-180-0109-3291

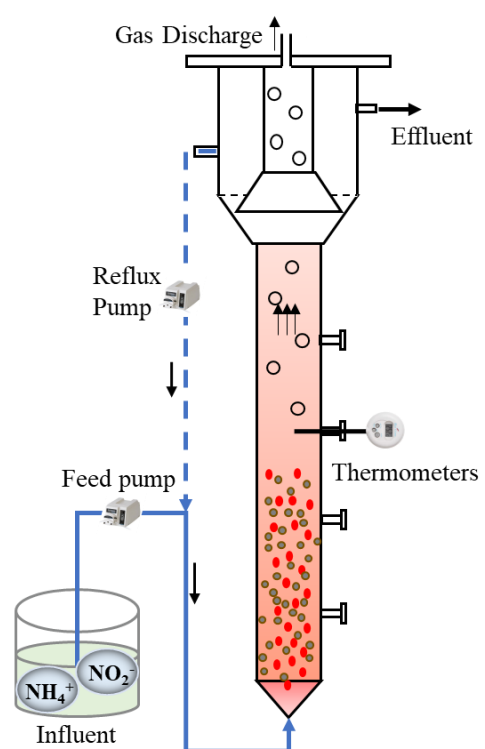

**Figure S1.** The device sketch of UASB reactor.

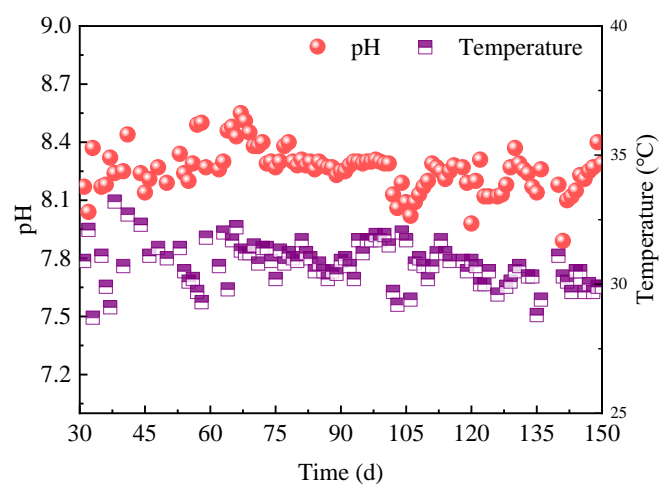

**Figure S2.** UASB reactor temperature and pH.

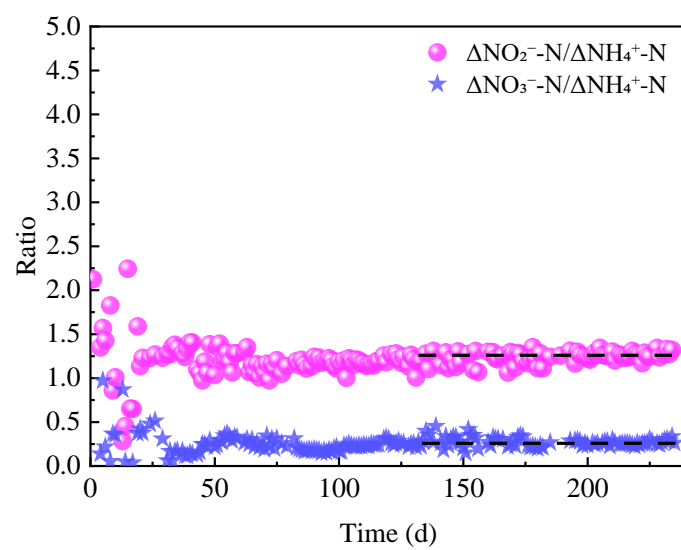

**Figure S3.**  $\Delta\text{NO}_2^- - \text{N} / \Delta\text{NH}_4^+ - \text{N}$  and  $\Delta\text{NO}_3^- - \text{N} / \Delta\text{NH}_4^+ - \text{N}$  reacted in UASB reactor.

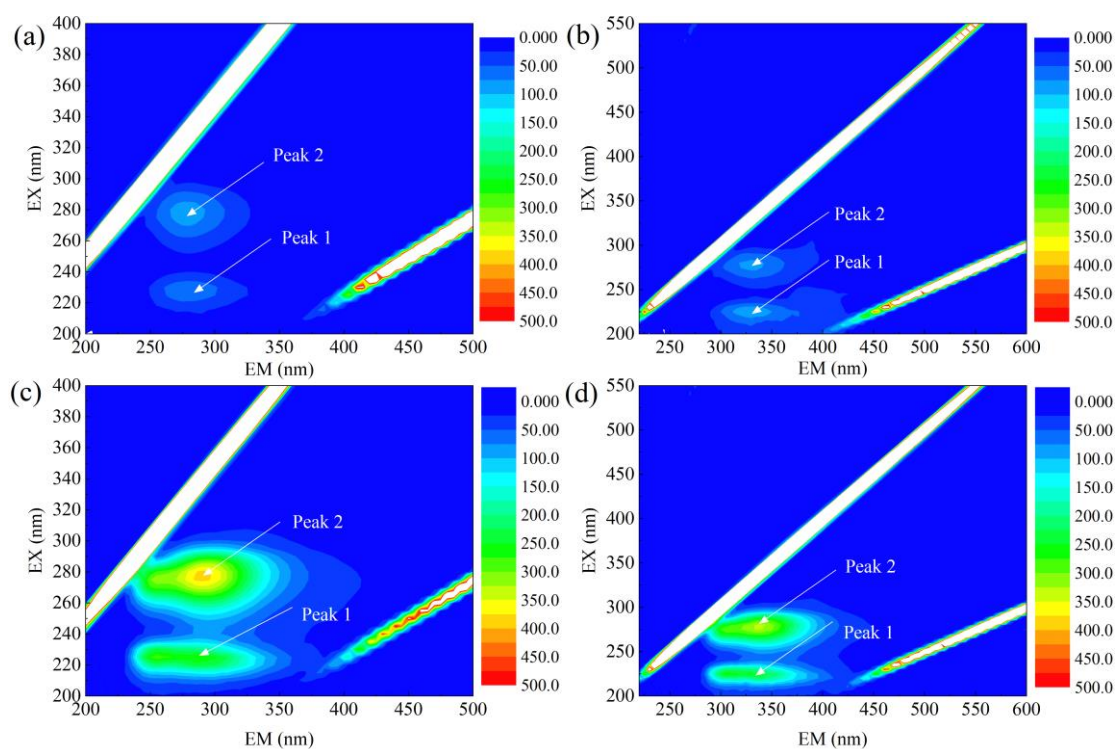

**Figure S4.** 3D-EEM of different EPS compositions for UASB reactors: (a) and (b) LB-EPS on day 60 and day 130, respectively; (c) and (d) TB-EPS on day 60 and day 130, respectively.
